# Supplementary material for: Ukraine Trauma Project: the feasibility of introducing advanced trauma-care skills to frontline emergency medical services responders
Source: HighWire-hosted journal article supplement (doi:10.1136/bmjopen-2023-077895), 2023-11-01
Supplement: bmjopen-2023-077895supp001_data_supplement.pdf [file bmjopen-2023-077895supp001_data_supplement.pdf]

|                                                                    |
|--------------------------------------------------------------------|
| <b>Ukraine Trauma Project<br/>Course Participant Questionnaire</b> |
|--------------------------------------------------------------------|

**Thank you for completing this anonymous survey.**

**1. Please indicate your level of confidence in USING the following techniques:**

(1 – no confidence, 2 – some confidence, 3 – fairly confident, 4 – complete confidence)

|                          | <b>BEFORE the course</b> | <b>AFTER the course</b> |
|--------------------------|--------------------------|-------------------------|
| Intraosseous access      |                          |                         |
| Intravenous access       |                          |                         |
| Administration of TXA    |                          |                         |
| Use of combat tourniquet |                          |                         |
| Use of pelvic binder     |                          |                         |
| Use of PENTHROX          |                          |                         |
| CBRN procedures          |                          |                         |

**2. Please indicate your level of confidence in TEACHING the following techniques to your colleagues:**

(1 – no confidence, 2 – some confidence, 3 – fairly confident, 4 – complete confidence)

|                          | <b>BEFORE the course</b> | <b>AFTER the course</b> |
|--------------------------|--------------------------|-------------------------|
| Intraosseous access      |                          |                         |
| Intravenous access       |                          |                         |
| Administration of TXA    |                          |                         |
| Use of combat tourniquet |                          |                         |
| Use of pelvic binder     |                          |                         |
| Use of PENTHROX          |                          |                         |
| CBRN procedures          |                          |                         |

**3. Please indicate your level of MEDICAL training prior to this course:**

- i. More than one year
- ii. Between six and twelve months
- iii. Between three and six months
- iv. Between one and three months
- v. Less than one month
